# Supplementary material for: Generation and characterization of monoclonal antibodies against pathologically phosphorylated TDP-43
Source: PubMed Central journal article supplement (PMC11025846; doi:10.1371/journal.pone.0298080), 2024-04-18

Figure 1A

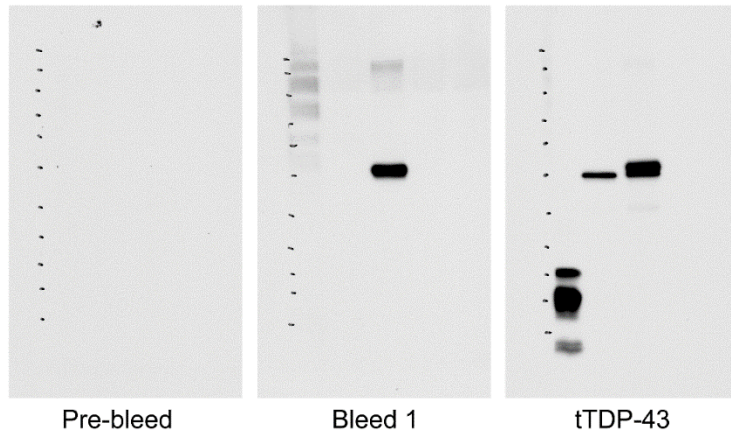

Figure 1B

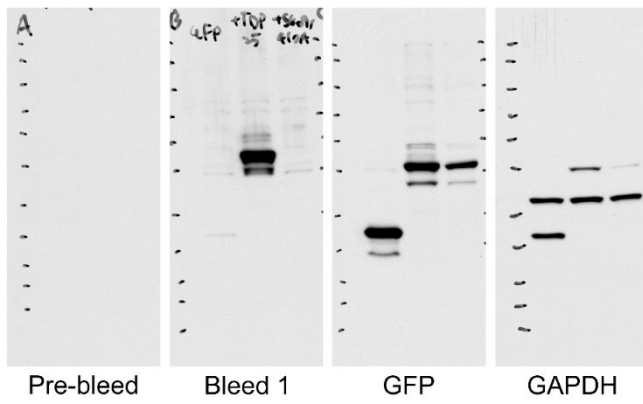

Figure 2A

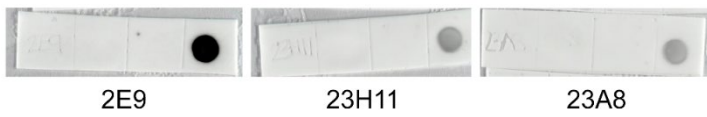

Figure 2B

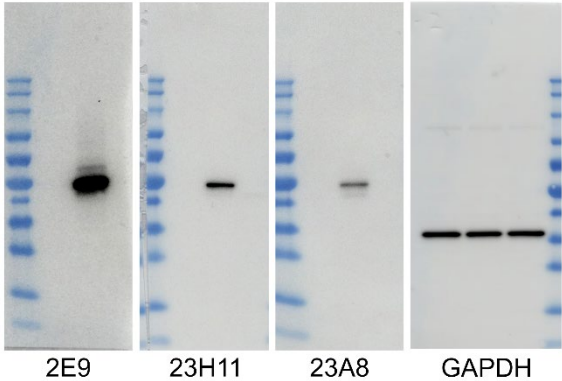

Figure 3B

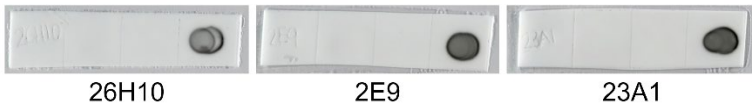

Figure 3C

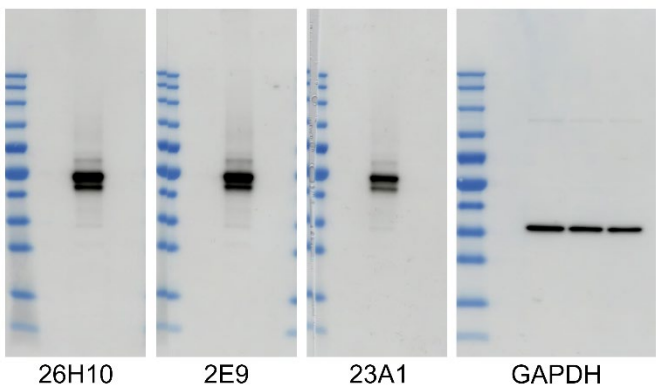

Figure 4A

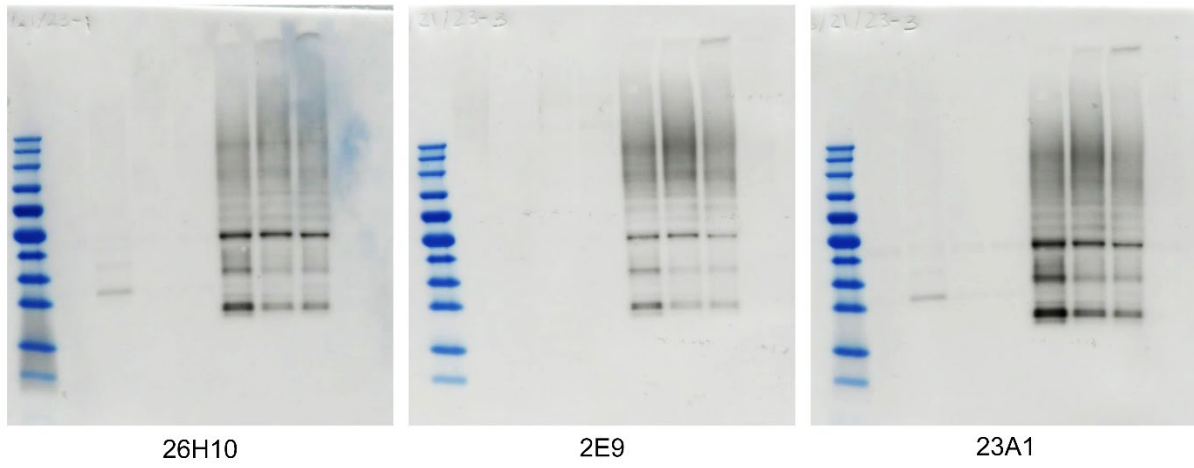

Figure S2

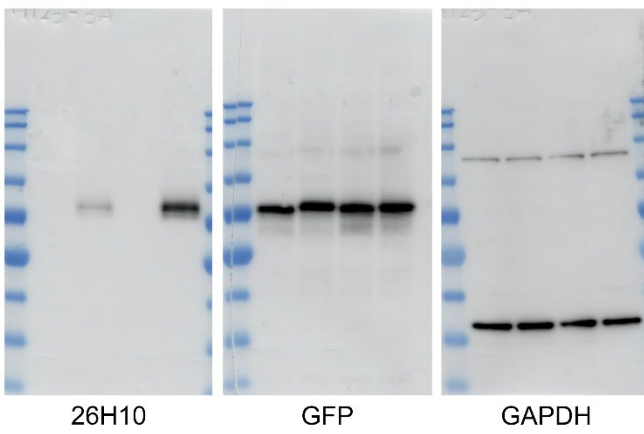

Figure S3A

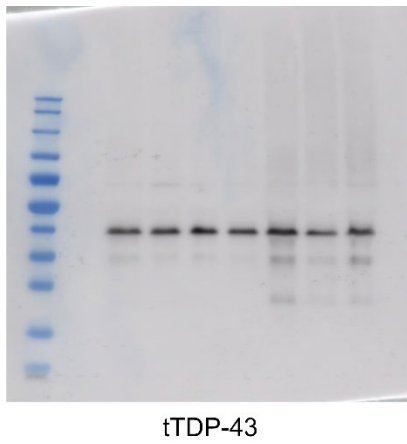

Supplement: pone.0298080.s006.pdf [file pone.0298080.s006.pdf]
